# Supplementary material for: Magnetic Fe3O4@SiO2@β-cyclodextrin for solid phase extraction of methyl parathion and fenthion in lettuce samples
Source: Royal Society of Chemistry journal article supplement (doi:10.1039/d1ay00681a), 2021-01-01
Supplement: d1ay00681a1.pdf [file d1ay00681a1.pdf]

## Supplementary information

# Magnetic Fe<sub>3</sub>O<sub>4</sub>@SiO<sub>2</sub>@β-cyclodextrin solid phase extraction of methyl parathion and fenthion in lettuce samples

Xinze Wu, Yifei Cao, Bin Sun, Huaixia Chen\*, Xueping Dang, Xiaolan Liu, Youhong Ai

*Hubei Collaborative Innovation Center for Advanced Organic Chemical Materials, Ministry-of-Education Key Laboratory for the Synthesis and Application of Organic Functional Molecules & College of Chemistry and Chemical Engineering, Hubei University, Wuhan 430062, China*

\* Address correspondence to Huaixia Chen, College of Chemistry and Chemical Engineering, Hubei University, Wuhan, 430062, China. E-mail: [hxch@hubu.edu.cn](mailto:hxch@hubu.edu.cn).

### 1. Optimization of synthesis conditions

In order to get better physical and chemical properties of Fe<sub>3</sub>O<sub>4</sub>@SiO<sub>2</sub>@β-CD, the amount of cross-linker and solvent composition were optimized.

In the experiment, 1.0, 1.5, 2.0, 2.5 and 3.0 mL of EGDMA as the cross-linker were tested, respectively. The results showed that the amount of cross-linker lower than 2.0 mL led to the incomplete polymerization. With the amount of cross-linker increased, the product gradually appeared like a bulk. Thus, 2.0 mL of EGDMA were chosen.

The porogenic solvent plays a key role in the formation of the polymer. The ratios of methanol to DMF in porogenic solvent 9:1, 5:1, 4:1, 2:1, 1:1, and 1:2 were investigated, respectively. The results showed that too much DMF in porogenic solvent resulted in non-uniform dispersion of the monomer, and less DMF resulted in incomplete reaction. Therefore, the mixture of methanol and DMF (1:1, v:v) was chosen as the porogenic solvent.

Table S1 The physicochemical properties of methyl parathion and fenthion and maximum residue levels (MRLs) in European Union and China<sup>a</sup>.

| Compound                              |                | Methyl parathion                                                                  | Fenthion                                                                           |
|---------------------------------------|----------------|-----------------------------------------------------------------------------------|------------------------------------------------------------------------------------|
| Formula                               |                | C <sub>8</sub> H <sub>10</sub> NO <sub>5</sub> PS                                 | C <sub>10</sub> H <sub>15</sub> O <sub>3</sub> PS <sub>2</sub>                     |
| Chemical structure                    |                | 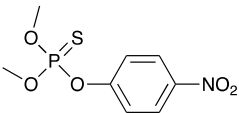 |  |
| MW (g mol <sup>-1</sup> )             |                | 263.21                                                                            | 278.33                                                                             |
| Water Solubility (g L <sup>-1</sup> ) |                | 0.05                                                                              | 0.055                                                                              |
| Log K <sub>ow</sub>                   |                | 2.86                                                                              | 4.091                                                                              |
| MRL<br>(μg kg <sup>-1</sup> )         | European Union | 10                                                                                | 20                                                                                 |
|                                       | China          | 20                                                                                | 50                                                                                 |

<sup>a</sup> References from and [www.ec.europa.eu](http://www.ec.europa.eu) for EU MRLs and [www.moa.gov.cn](http://www.moa.gov.cn) for China MRLs.

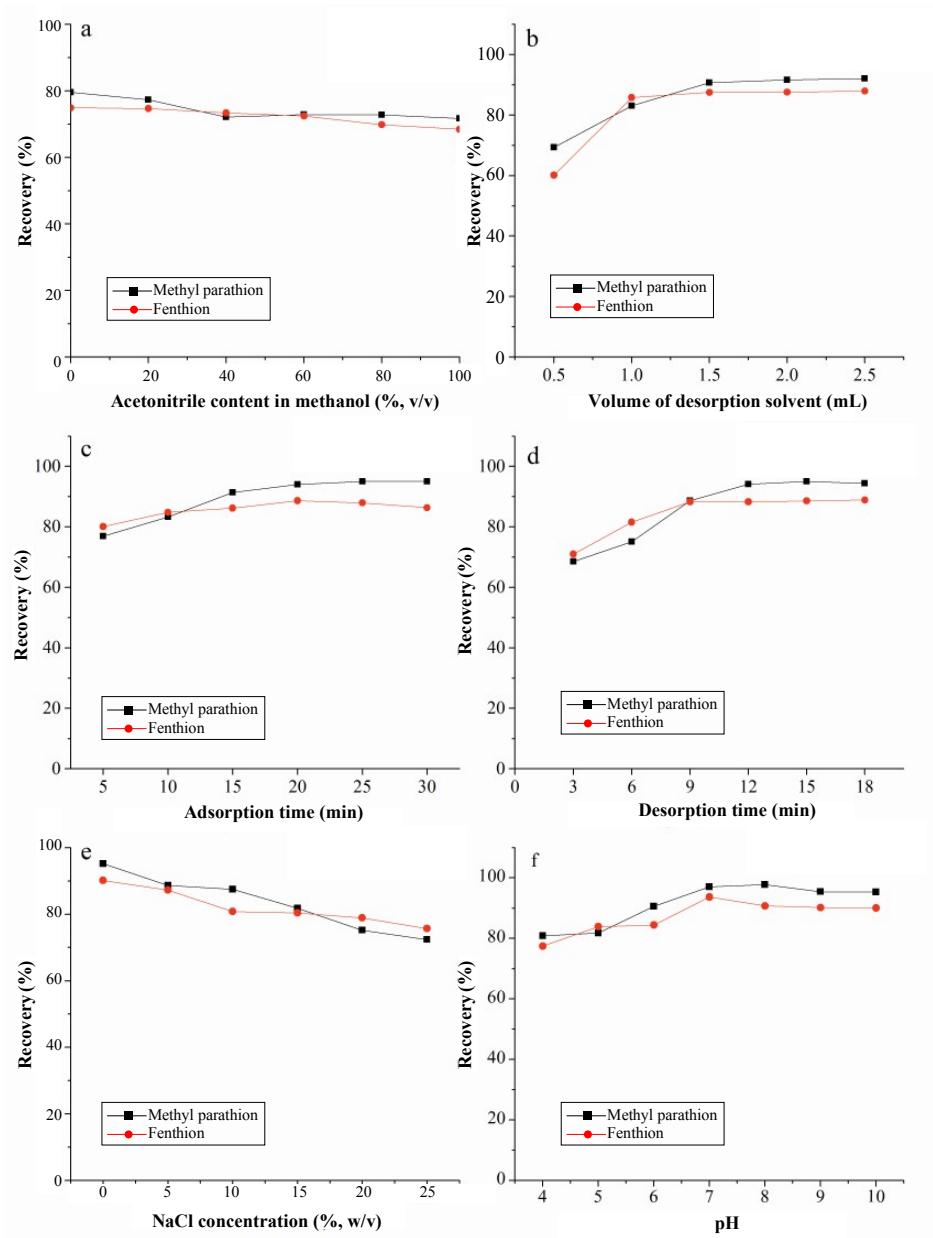

Fig. S1 Effect of desorption solvent type (a), desorption solvent volume (b), adsorption time (c), desorption time (d), sample ionic strength (e) and pH (f) on the extraction of methyl parathion and fenthion.
